# Supplementary material for: Modeling Regional Production Capacity Loss Rates Considering Response Bias: Insights from a Questionnaire Survey on Zhengzhou Flood
Source: Copernicus journal article supplement (doi:10.5194/egusphere-2024-3923), 2025-03-27
Supplement: Supplementary file [file egusphere-2024-3923-AC1-supplement.pdf]

## Appendix A

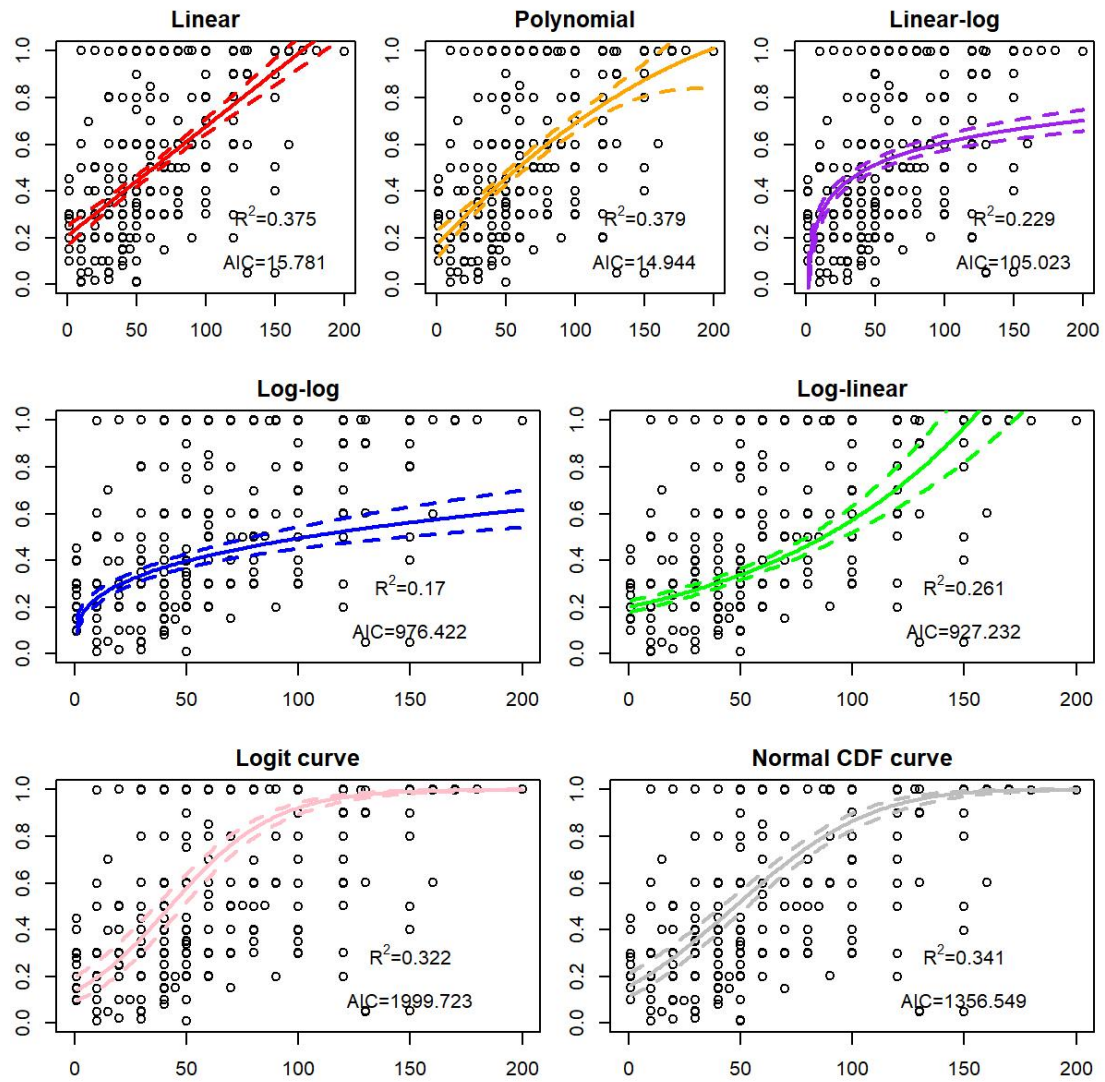

Fig.S1. Vulnerability curves of loss rates for seven types across all sectors

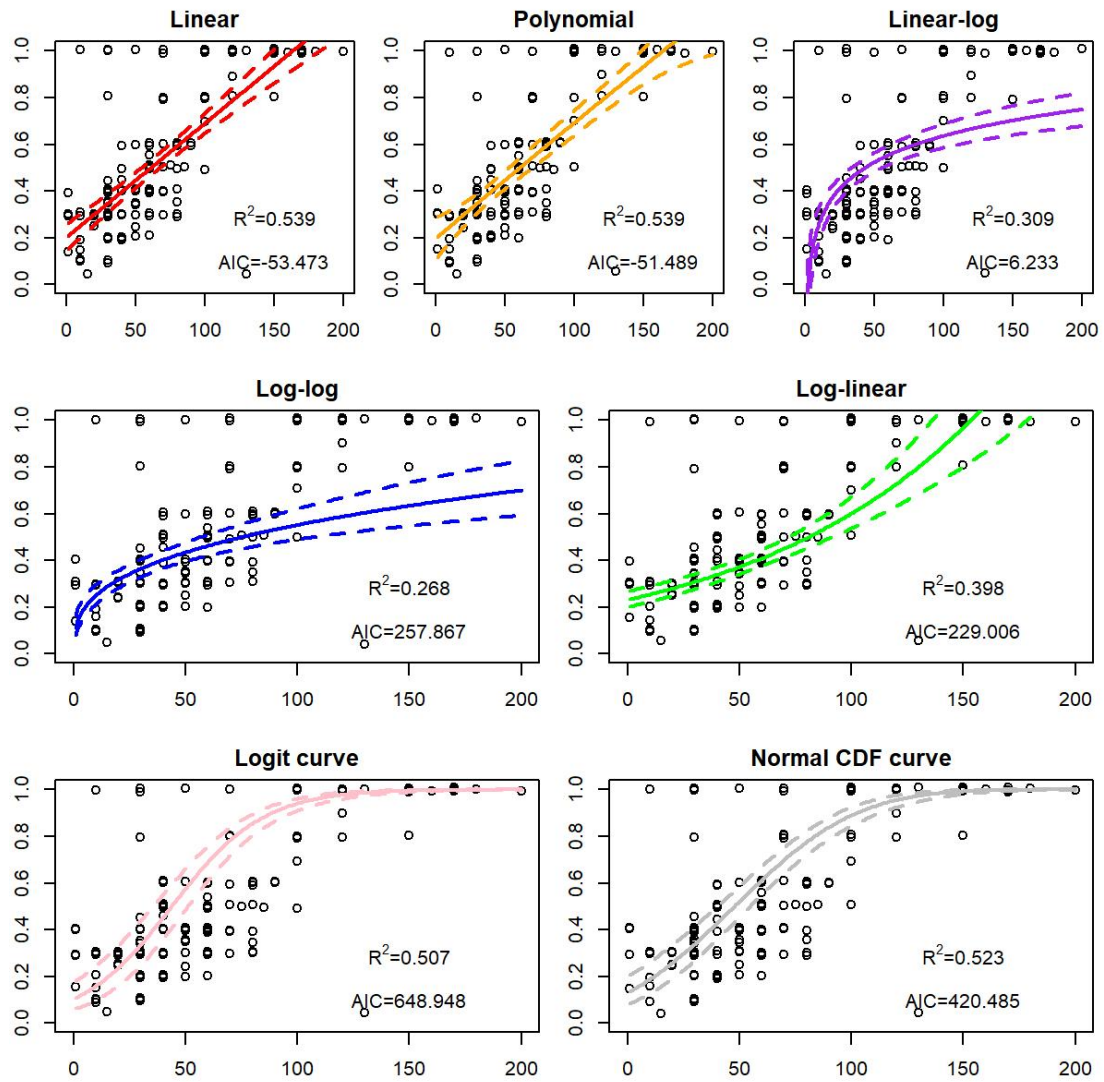

Fig.S2.Vulnerability curves of loss rates for seven types across manufacturing sector

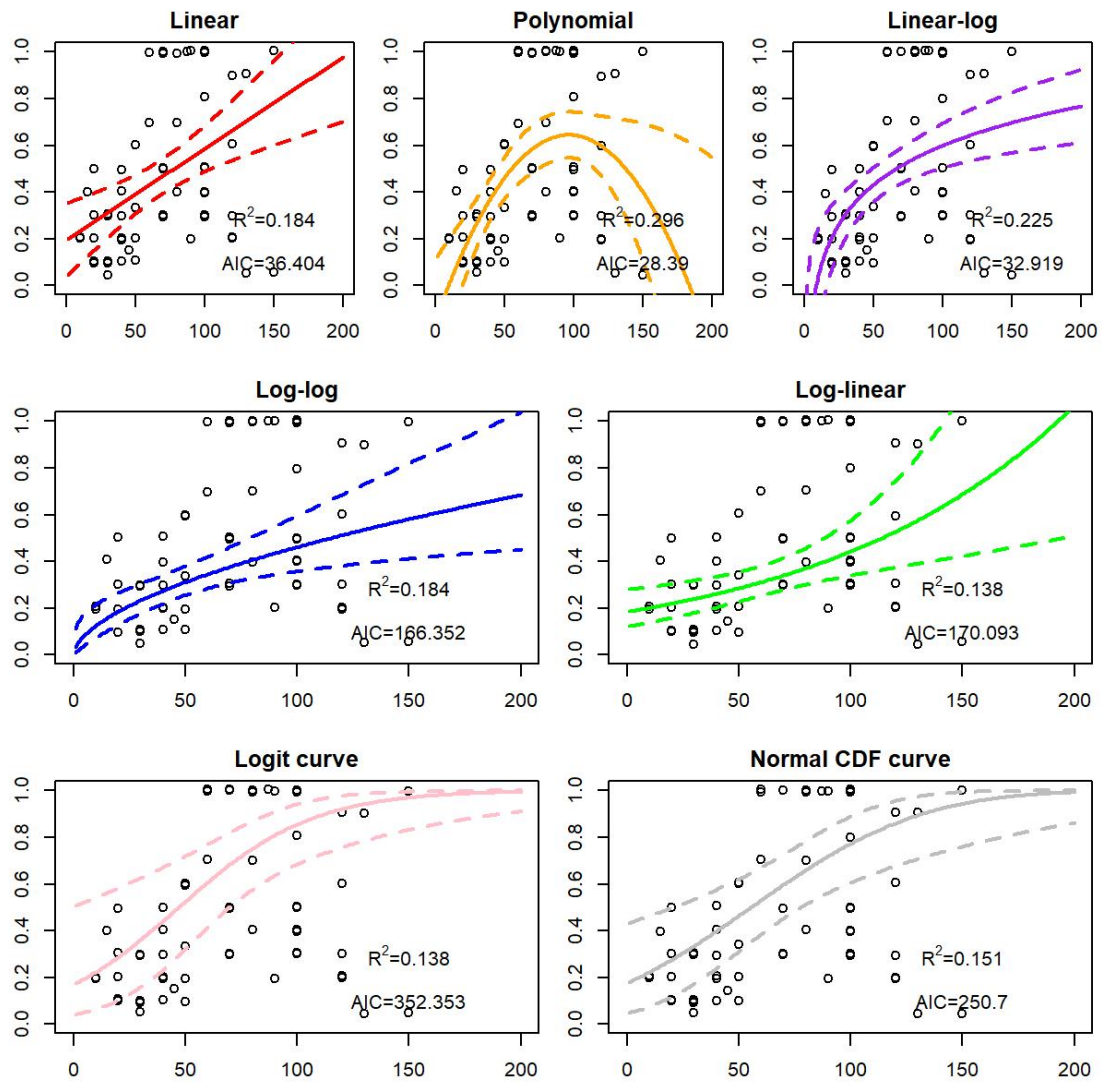

Fig.S3.Vulnerability curves of loss rates for seven types across accommodation and catering sector

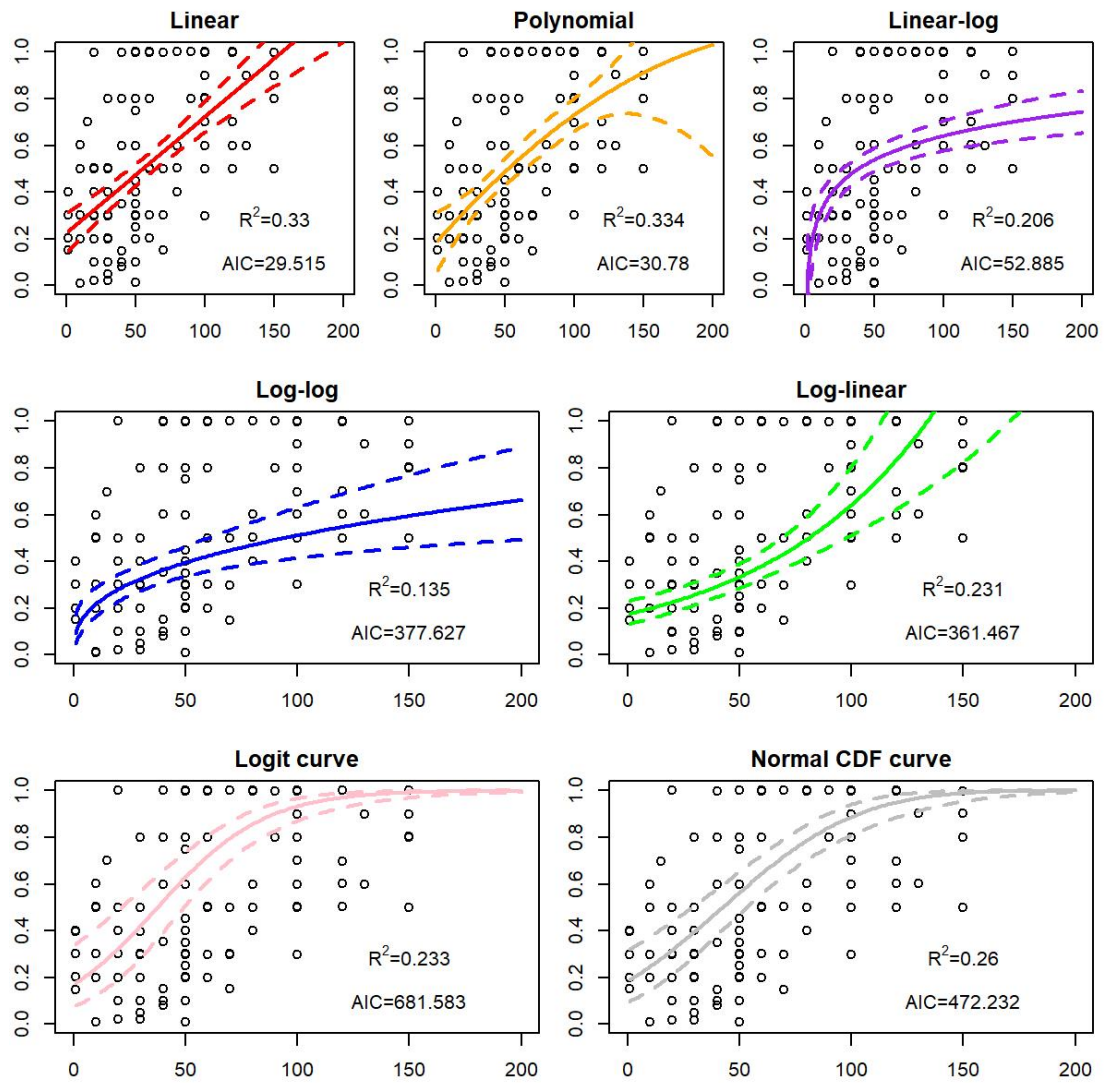

Fig.S4.Vulnerability curves of loss rates for seven types across wholesale and retail trade sector

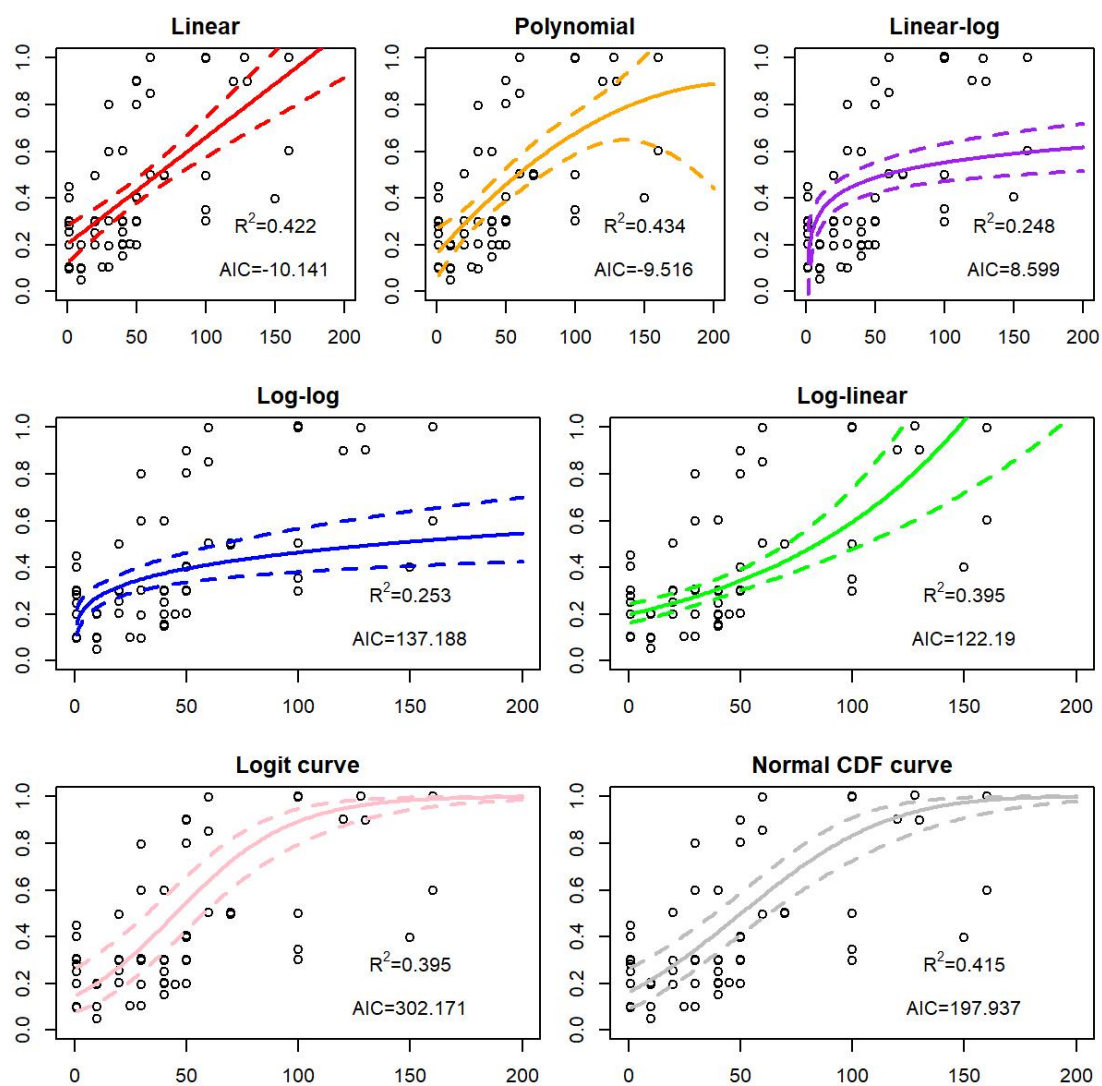

Fig.S5.Vulnerability curves of loss rates for seven types across other sector

## Appendix B

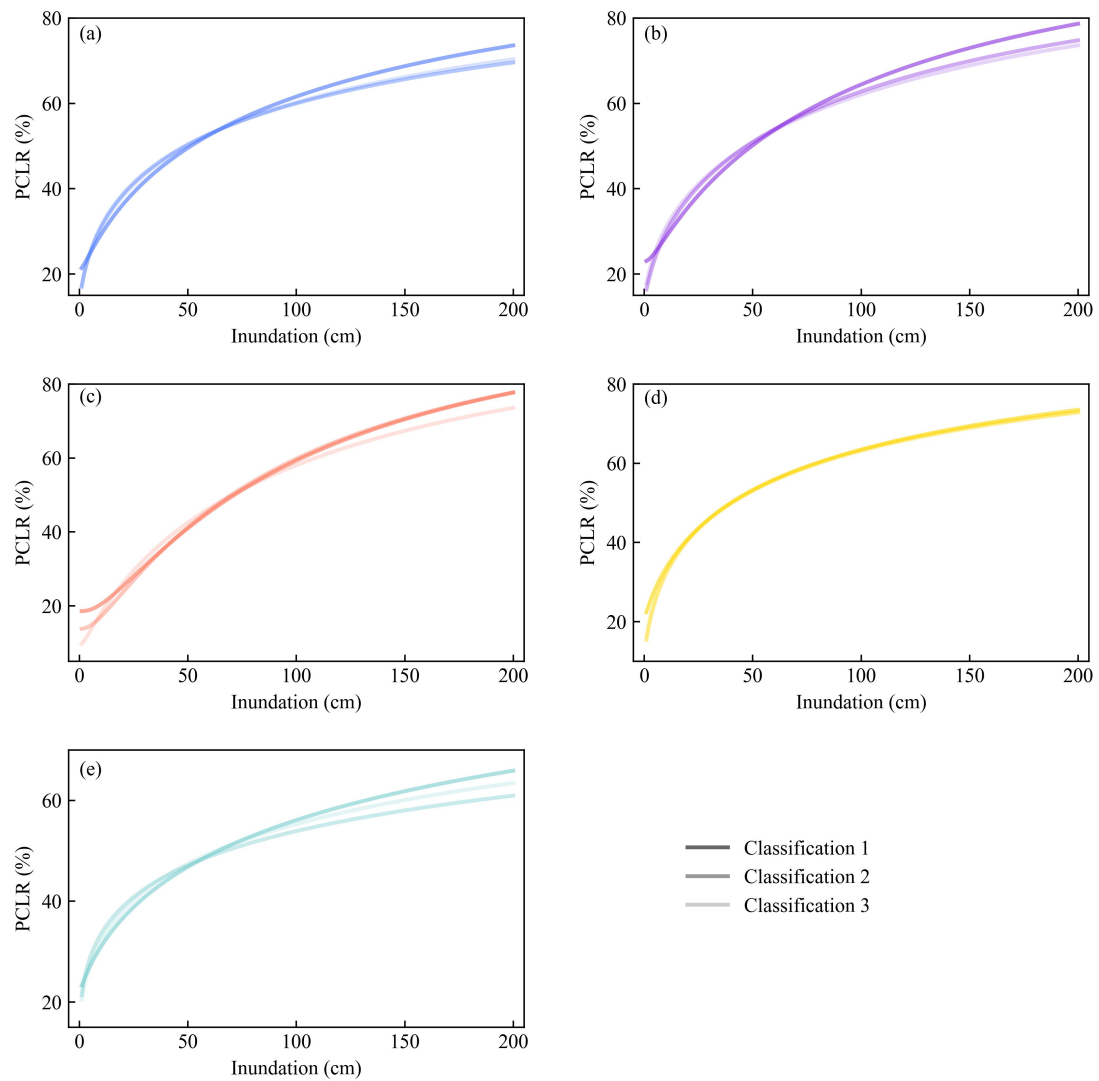

Fig.S6. Comparison under different threshold classifications. (a) All sectors; (b) manufacturing; (c) accommodation and catering; (d) wholesale and retail trade; (e) other sectors.
