# Supplementary material for: Modeling Regional Production Capacity Loss Rates Considering Response Bias: Insights from a Questionnaire Survey on Zhengzhou Flood
Source: Copernicus journal article supplement (doi:10.5194/egusphere-2024-3923), 2025-03-27
Supplement: Supplementary file [file egusphere-2024-3923-AC2-supplement.pdf]

## Appendix A

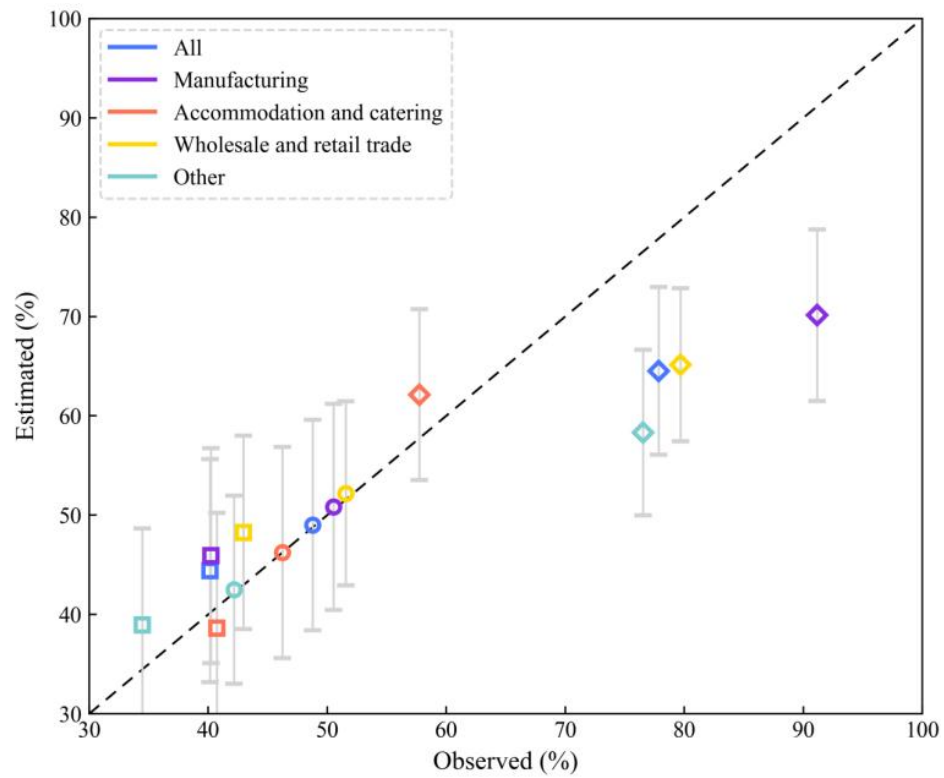

Fig.S1. Comparison results between estimated values and observed values

## Appendix B

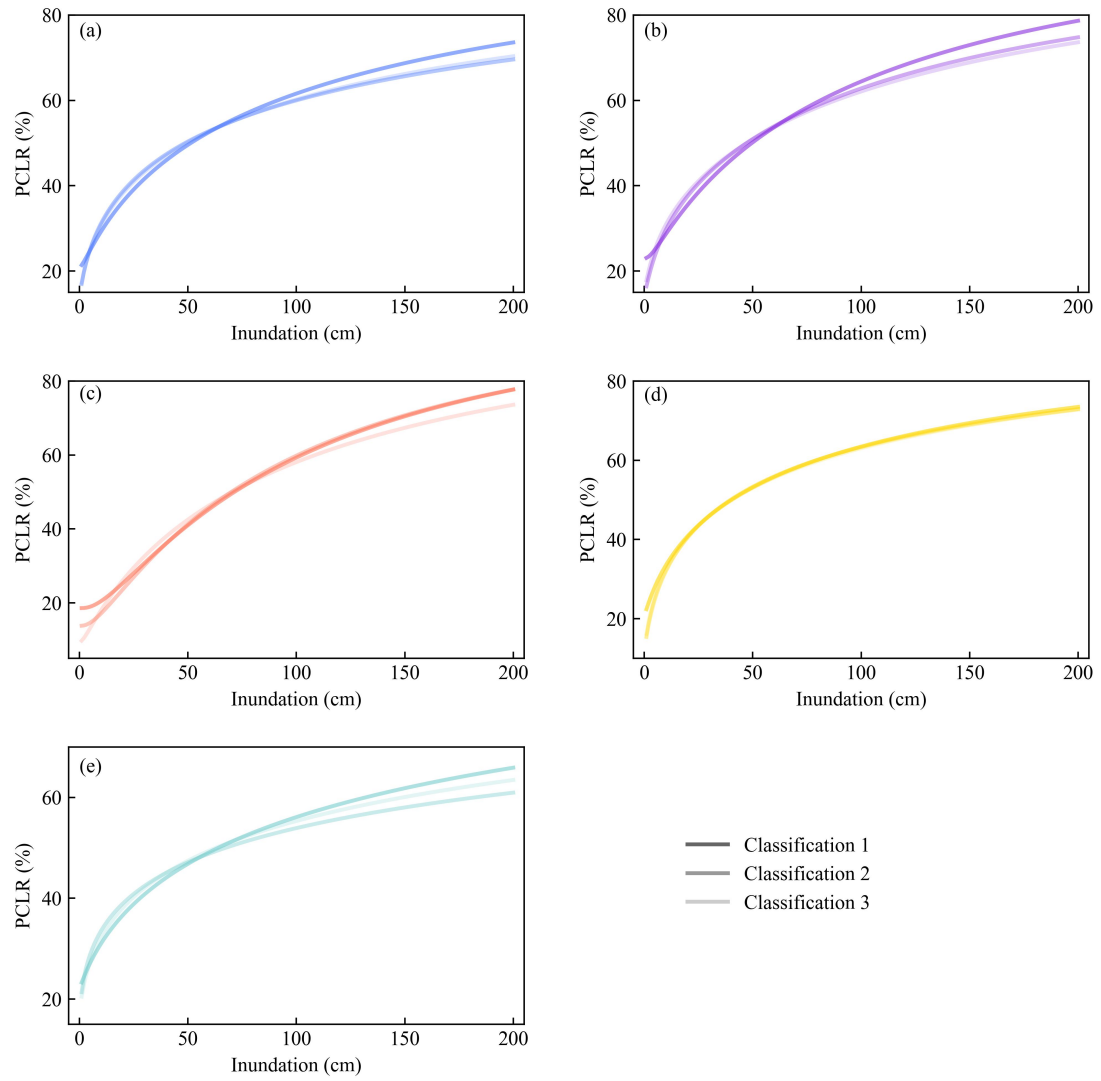

Fig.S2. Comparison under different threshold classifications. (a) All sectors; (b) manufacturing; (c) accommodation and catering; (d) wholesale and retail trade; (e) other sectors.
